# Supplementary material for: Dependence of structural and optoelectronic properties of sputtered Mg0.50Zn0.50O films on substrate
Source: Royal Society of Chemistry journal article supplement (doi:10.1039/c3ce26251k), 2013-01-01
Supplement: c3ce26251k.pdf [file c3ce26251k.pdf]

The videos of the XRD scan and photocurrent spectrums of sample A and B can be found at following website:

$\theta$ -2 $\theta$  scan of sample A:

[http://s1265.beta.photobucket.com/user/zqhero/media/sampleA2thetaomega\\_zps4d309da5.mp4.html](http://s1265.beta.photobucket.com/user/zqhero/media/sampleA2thetaomega_zps4d309da5.mp4.html)

phi-scan of sample A

[http://s1265.beta.photobucket.com/user/zqhero/media/sampleAphiscaan\\_zpsd363b667.mp4.html](http://s1265.beta.photobucket.com/user/zqhero/media/sampleAphiscaan_zpsd363b667.mp4.html)

$\theta$ -2 $\theta$  scan of sample B

[http://s1265.beta.photobucket.com/user/zqhero/media/sampleB-2thetaomega\\_zps6ca68a81.mp4.html](http://s1265.beta.photobucket.com/user/zqhero/media/sampleB-2thetaomega_zps6ca68a81.mp4.html)

phi-scan of sample B:

[http://s1265.beta.photobucket.com/user/zqhero/media/sampleBphiscaan\\_zps46c0aea1.mp4.html](http://s1265.beta.photobucket.com/user/zqhero/media/sampleBphiscaan_zps46c0aea1.mp4.html)

$\theta$ -2 $\theta$  scan of sample C:

[http://s1265.beta.photobucket.com/user/zqhero/media/sampleC2thetaomega\\_zps542f8aca.mp4.html](http://s1265.beta.photobucket.com/user/zqhero/media/sampleC2thetaomega_zps542f8aca.mp4.html)

Photocurrent spectrum of sample A under 10V:

[http://s1265.beta.photobucket.com/user/zqhero/media/photocurrentofsampleAunder10V223\\_zps56a96abd.mp4.html](http://s1265.beta.photobucket.com/user/zqhero/media/photocurrentofsampleAunder10V223_zps56a96abd.mp4.html)

Photocurrent spectrum of sample B under 3V:

[http://s1265.beta.photobucket.com/user/zqhero/media/photocurrentofsampleBunder3V\\_zps65eafb1c.mp4.html](http://s1265.beta.photobucket.com/user/zqhero/media/photocurrentofsampleBunder3V_zps65eafb1c.mp4.html)

Fig.1 shows the SEM image of  $Mg_{0.50}Zn_{0.50}O$  grown on various substrates. As can be seen,  $Mg_{0.50}Zn_{0.50}O$  film grown on MgO substrate has a much flatter surface with regular morphology.  $Mg_{0.50}Zn_{0.50}O$  film grown on sapphire substrate has worm-shape un-regular morphology. Due to the phase separation, surface of  $Mg_{0.50}Zn_{0.50}O$  film grown on quartz substrate consists of two kinds of morphologies. These are consistent with the results of AFM and the XRD measurements.

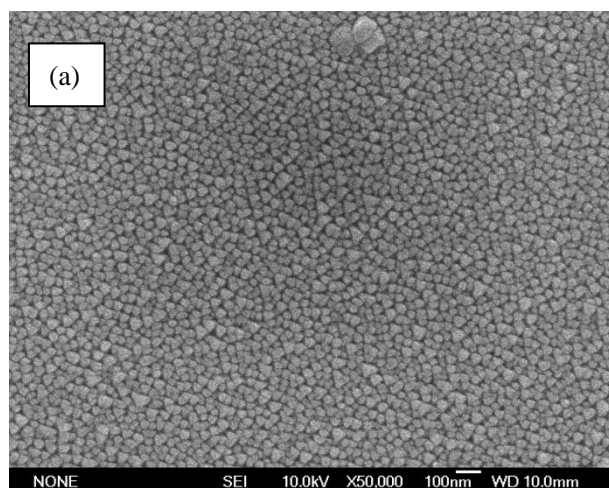

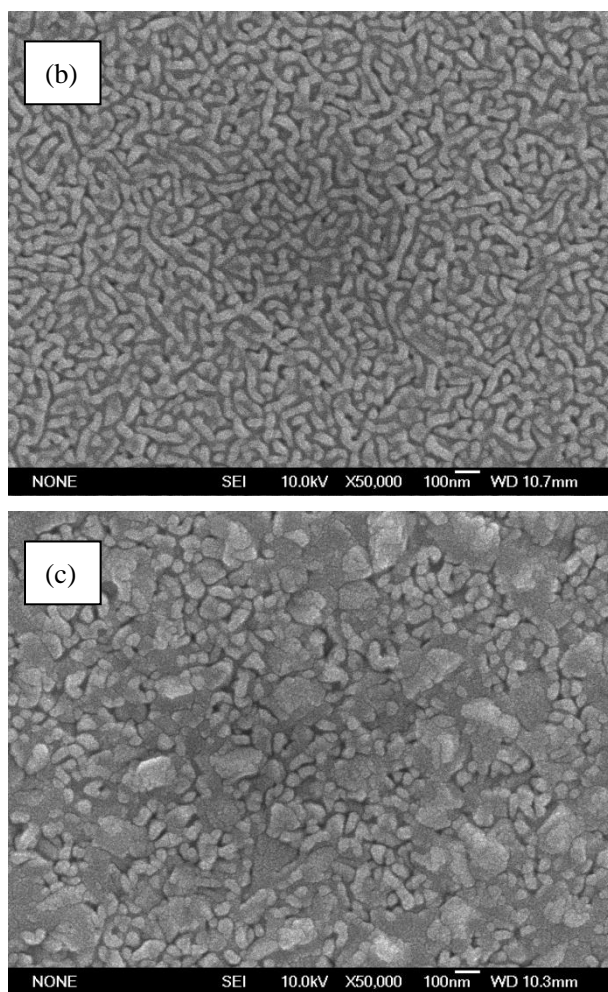

Fig.1 SEM images of  $Mg_{0.50}Zn_{0.50}O$  grown on various substrates, (a) on MgO, (b) on sapphire and (c) on quartz substrates.
